# Supplementary material
Source: Springer Nature journal article supplement (https://www.springermedizin.de/resource/supplementary/12895_2009_106_MOESM3_ESM.pdf/9514142)

**TGF $\beta$ 1/ $\beta$ actin (1), TGF $\beta$ 2/ $\beta$ actin (2), TGFR1/ $\beta$ actin (3), and TGFR2/ $\beta$ actin (4) Expression Ratio in Patients with Chemical dermatitis, Chronic dermatitis, and Normal group**

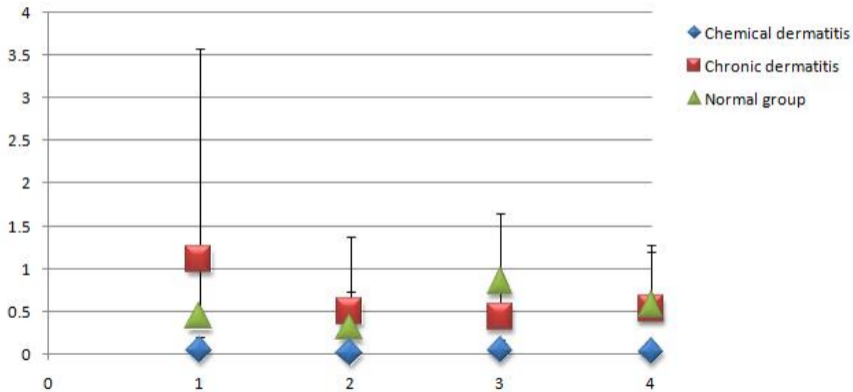

Supplement: MOESM3 [file 9514142]
